# Supplementary material for: Novel amphiphilic and photo-responsive ABC 3-miktoarm star terpolymers: synthesis, self-assembly and photo-responsive behavior
Source: Royal Society of Chemistry journal article supplement (doi:10.1039/c2py21043f), 2013-01-01
Supplement: c2py21043f.pdf [file c2py21043f.pdf]

## Supporting Information:

### Novel Amphiphilic and Photo-Responsive ABC 3-Miktoarm Star Terpolymer: Synthesis, Self-Assembly and Photo-Responsive Behavior

Wuqiong Sun<sup>1</sup>, Xiaohua He<sup>1\*</sup>, Chunyan Gao<sup>1</sup>, Xiaojuan Liao<sup>1</sup>, Meiran, Xie<sup>1</sup>, Shaoliang Lin<sup>2\*</sup>,  
Deyue Yan<sup>3</sup>

<sup>1</sup>) Department of Chemistry, East China Normal University, 500 Dongchuan Road, Shanghai 200241, China

E-mail: [xhhe@chem.ecnu.edu.cn](mailto:xhhe@chem.ecnu.edu.cn) (X. He), [slin@ecust.edu.cn](mailto:slin@ecust.edu.cn) (S. Lin)

<sup>2</sup>) Shanghai Key Laboratory of Advanced Polymer Materials, School of Materials Science and Engineering, East China University of Science and Technology, Shanghai 200237, China

<sup>3</sup>) School of Chemistry & Chemical Engineering, Shanghai Jiao Tong University, 800 Dongchuan Road, Shanghai 200240, China

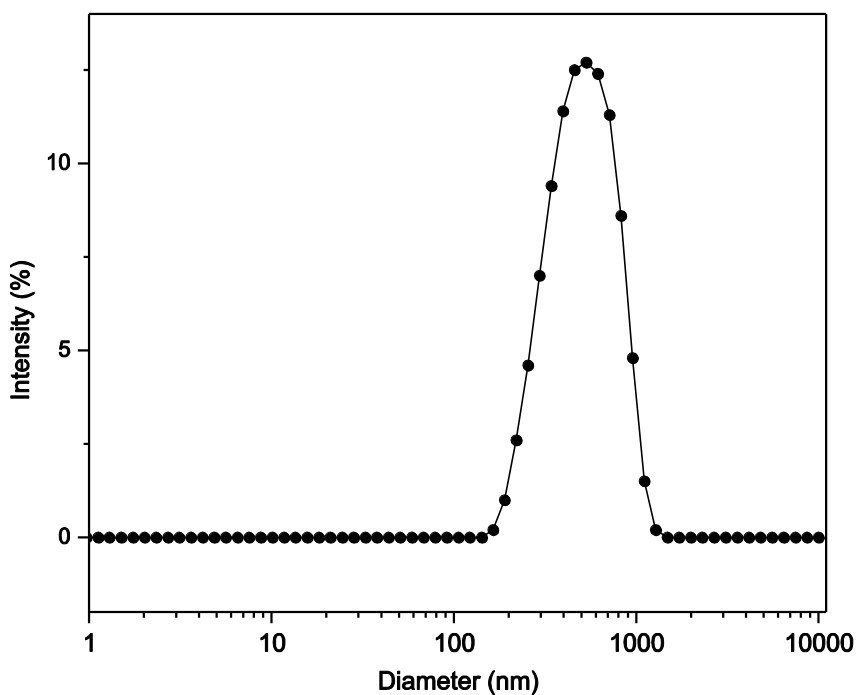

**Figure S1.** The self-assembled aggregate size distribution profile of (MPEG<sub>114</sub>)(PS<sub>45</sub>)(PMMAZO<sub>57</sub>) determined by DLS.

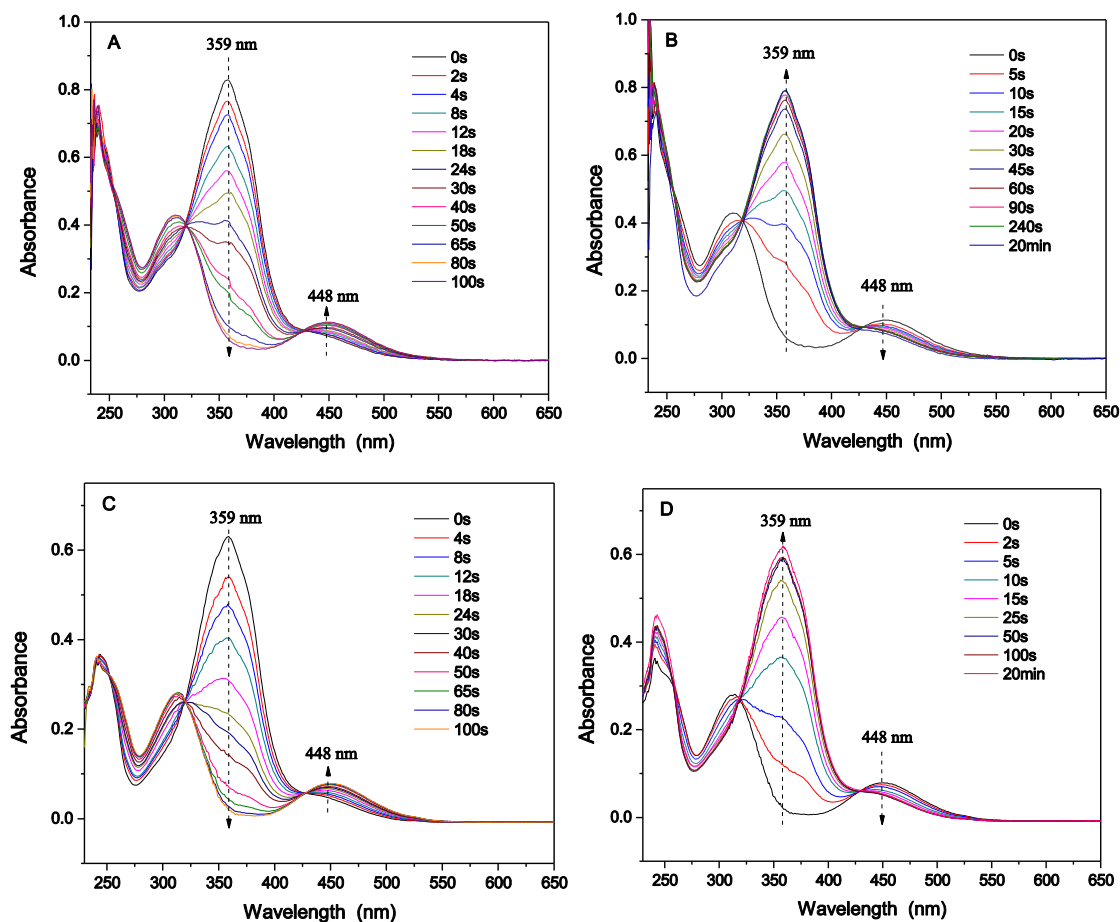

Figure 2S. Photochemical processes of (MPEG<sub>114</sub>)(PS<sub>45</sub>)(PMMAZO<sub>18</sub>) (A and B) and (MPEG<sub>114</sub>)(PS<sub>77</sub>)(PMMAZO<sub>59</sub>) (C and D) in CHCl<sub>3</sub> with the irradiation of 365 nm light (A and C) and 450 nm light (B and D). For B and D, 0 s is the spectrum after irradiation of 365 nm until photostationary state reached.

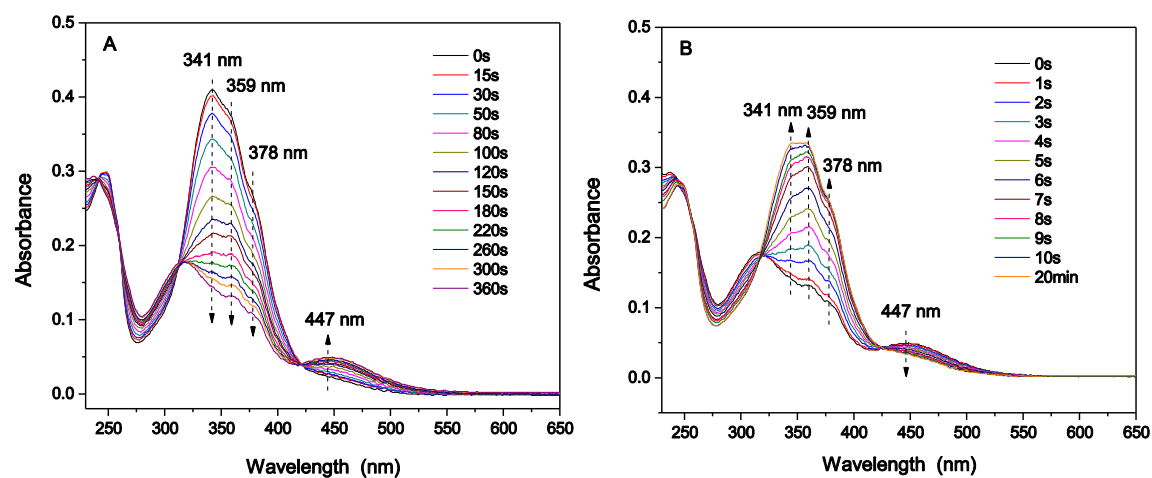

Figure 3S. Photochemical progresses of the vesicle solution of (MPEG<sub>114</sub>)(PS<sub>77</sub>)(PMMAZO<sub>59</sub>) with the irradiation of 356 nm UV light (A) and visible light (B). For B, 0 s is the spectrum after irradiation of 365 nm until photostationary state reached.
